# Supplementary material
Source: PubMed Central journal article supplement (PMC3280551)

Fig1 B

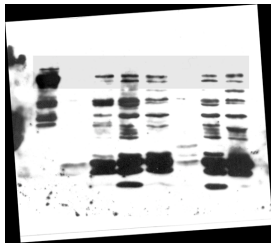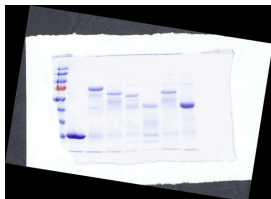

Fig1 D

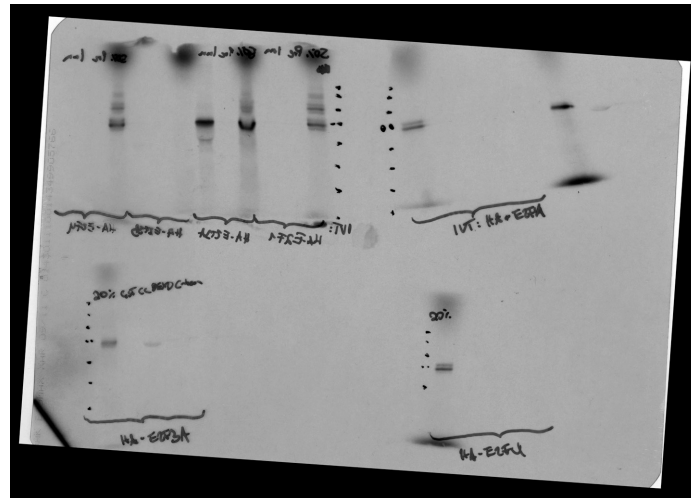

Fig1 E

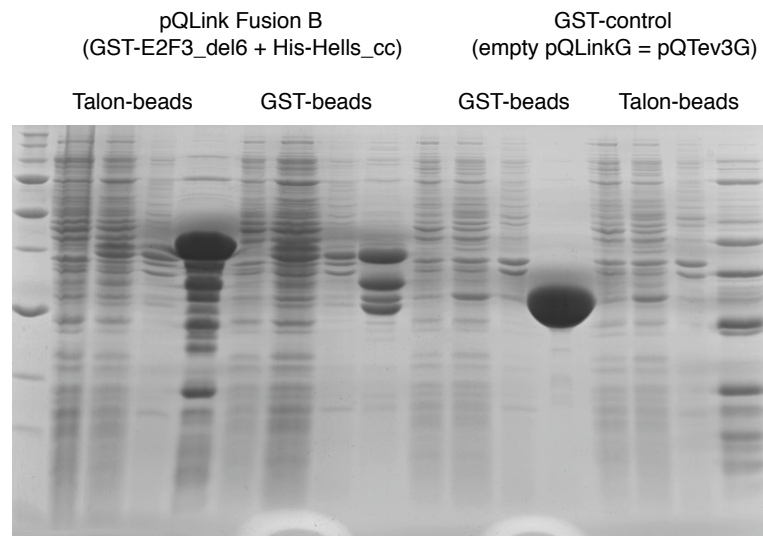

Fig1 F

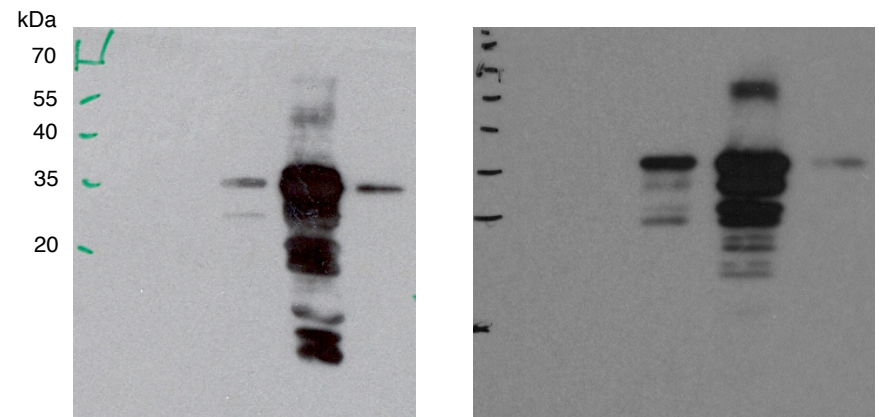

Fig2 A

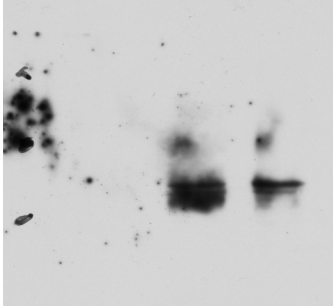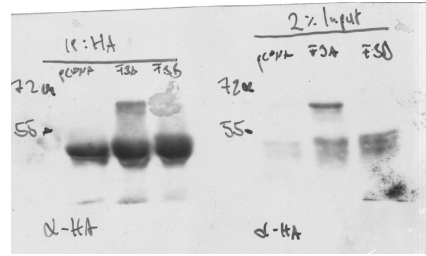

Fig2 B

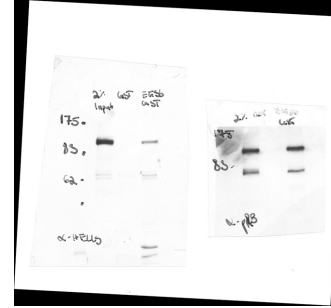

Fig2 C

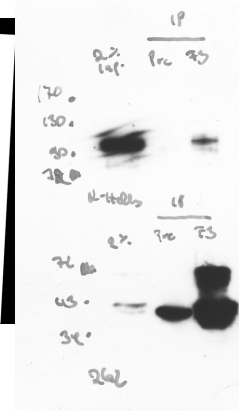

Fig2 D

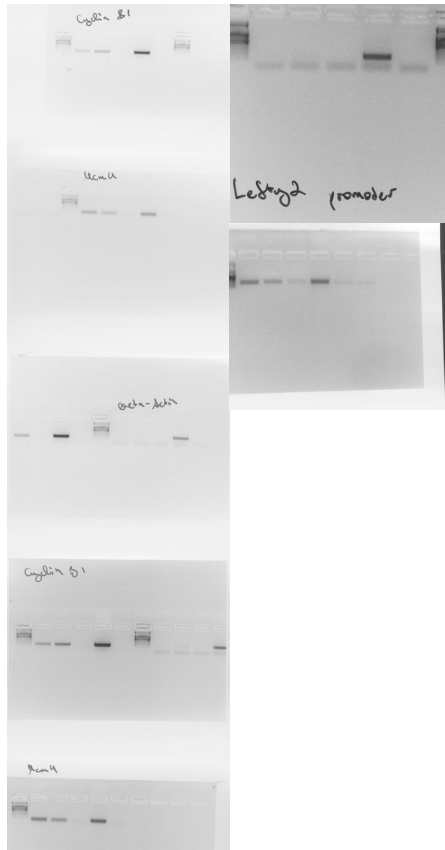

Fig2 F

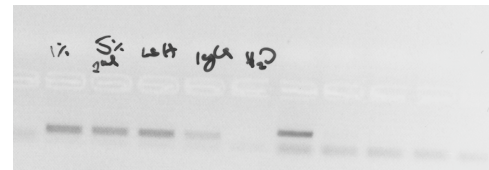

Fig3 B

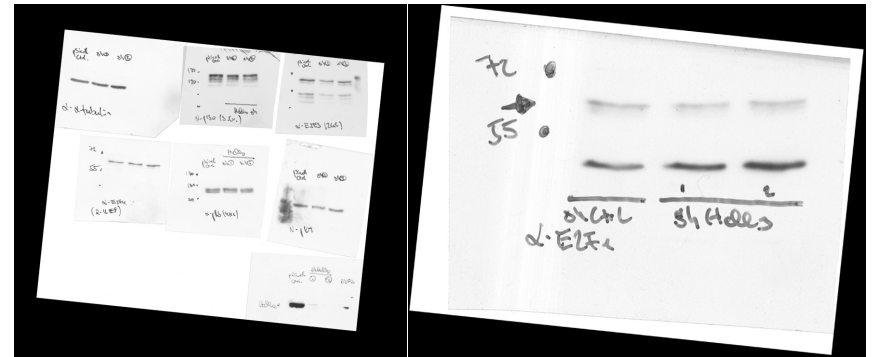

Fig4 A

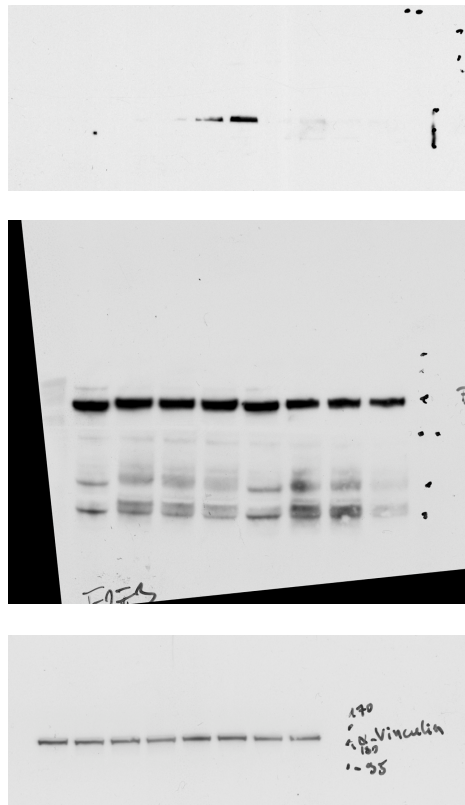

Fig7 D

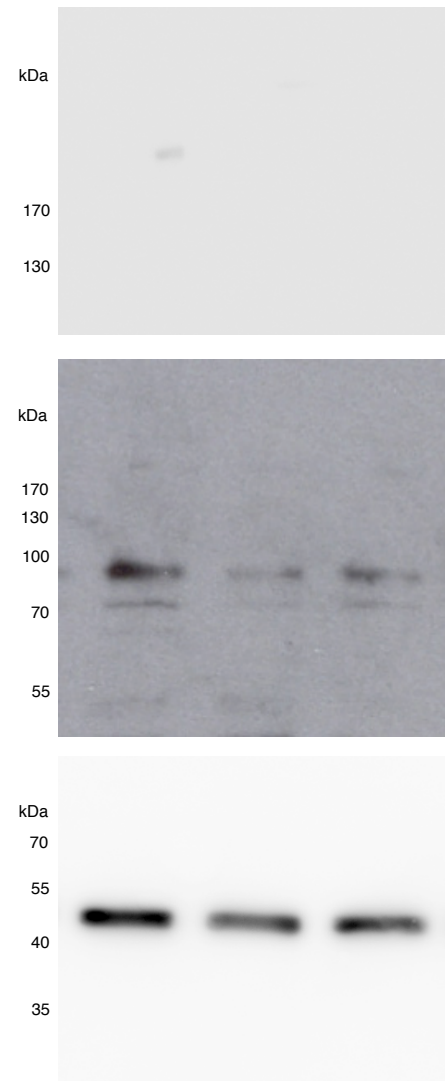

Supplement: emboj2011451s2.pdf [file emboj2011451s2.pdf]
